# Supplementary material
Source: PubMed Central journal article supplement (PMC2962492)

### **SUPPLEMENTAL FIGURE LEGENDS**

Supplemental Fig. *Identification of pentosidine formation site of spectrin.* Glycated spectrin digested by lysyl-endopeptidase for 60 min. was separated on a one-dimensional 12% NuPAGE Novex Bis-Tris Mini Gel in MES running buffer and blotted onto two PVDF membranes; one was stained with CBB (*left panel*) and the other probed with anti-pentosidine antibody (*right panel*). N-terminal sequence of both the indicated peptides (# 1 and #2) was identical.

# Supplemental Fig.

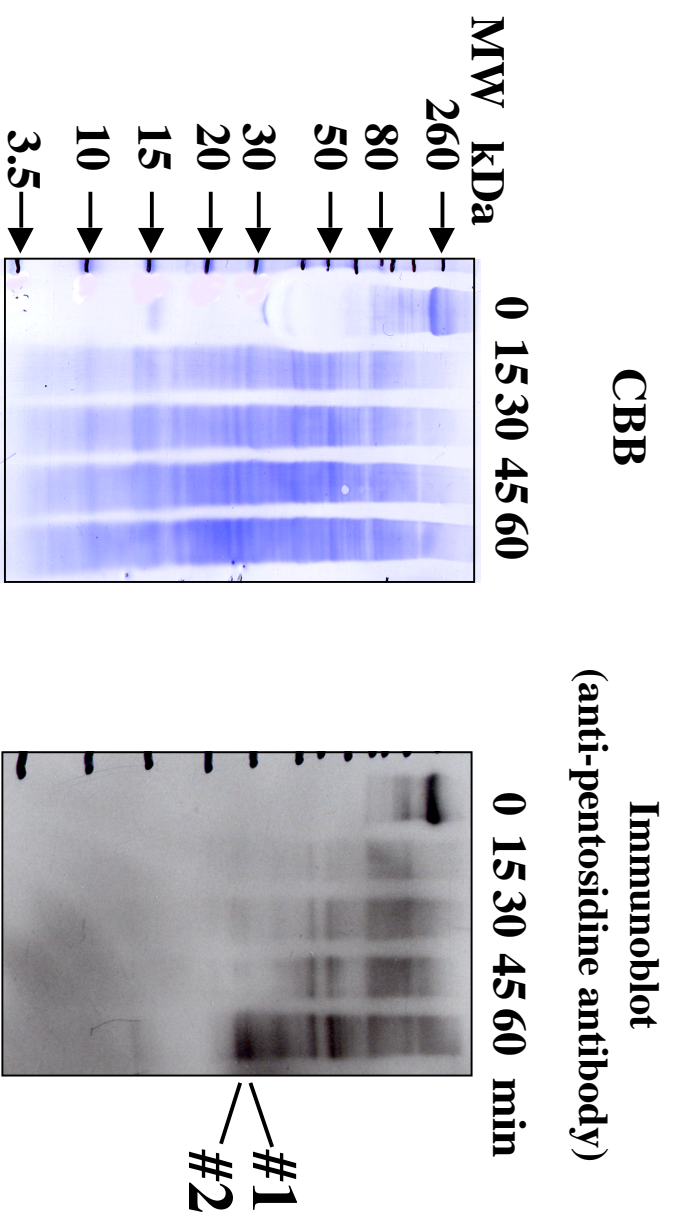

Supplement: supp_M110.126896_final.pdf [file supp_M110.126896_final.pdf]
